# Supplementary material for: Genetic Impact on Clinical Features in Parkinson’s Disease: A Study on SNCA-rs11931074
Source: Hindawi journal article supplement (doi:10.1155/2018/2754541), 2018-12-03
Supplement: f1 [file 2754541.f1.pdf]

**Supplementary Table 1. Results of eQTLs from Braineac database.**

| geneSymbol     | marker        | rsid       | exprID  | chr  | start   | stop    | aveALL          | CRBL            | FCTX     | HIPP     | MEDU            | OCTX            | PUTM     | SNIG     | TCTX            | THAL            | WHMT            |
|----------------|---------------|------------|---------|------|---------|---------|-----------------|-----------------|----------|----------|-----------------|-----------------|----------|----------|-----------------|-----------------|-----------------|
| <i>MMRNI</i>   | chr4:90639515 | rs11931074 | 2735759 | chr4 | 9.1E+07 | 9.1E+07 | <b>9.50E-03</b> | <b>2.80E-03</b> | 5.30E-02 | 6.60E-01 | 7.00E-01        | <b>1.80E-02</b> | 5.60E-01 | 6.80E-01 | 3.00E-01        | <b>2.50E-04</b> | 4.20E-01        |
| <i>FAM190A</i> | chr4:90639515 | rs11931074 | 2735862 | chr4 | 9.1E+07 | 9.3E+07 | <b>3.30E-02</b> | 4.70E-01        | 7.60E-01 | 5.50E-01 | 1.50E-01        | 2.90E-01        | 4.60E-01 | 6.60E-01 | 1.70E-01        | 1.70E-01        | <b>7.70E-04</b> |
| <i>MMRNI</i>   | chr4:90639515 | rs11931074 | 2735775 | chr4 | 9.1E+07 | 9.1E+07 | <b>4.90E-02</b> | 9.00E-02        | 1.40E-01 | 4.00E-01 | 3.00E-01        | 3.20E-01        | 2.30E-01 | 6.20E-01 | 5.70E-02        | <b>1.50E-03</b> | 4.30E-01        |
| <i>MMRNI</i>   | chr4:90639515 | rs11931074 | 2735782 | chr4 | 9.1E+07 | 9.1E+07 | <b>2.80E-02</b> | 1.90E-01        | 3.70E-01 | 6.90E-01 | 9.00E-01        | 9.00E-01        | 3.90E-01 | 9.40E-02 | 5.50E-02        | <b>1.60E-03</b> | 3.10E-01        |
| <i>FAM13A</i>  | chr4:90639515 | rs11931074 | 2777589 | chr4 | 9E+07   | 9E+07   | 6.30E-01        | 7.50E-01        | 1.20E-01 | 6.60E-01 | <b>2.00E-03</b> | 6.20E-01        | 4.70E-01 | 6.30E-01 | 8.20E-01        | 1.70E-01        | 1.10E-01        |
| <i>MMRNI</i>   | chr4:90639515 | rs11931074 | 2735768 | chr4 | 9.1E+07 | 9.1E+07 | 2.30E-01        | 6.50E-01        | 5.90E-01 | 7.40E-01 | 1.20E-01        | <b>8.50E-03</b> | 5.30E-01 | 2.30E-01 | 8.40E-01        | 1.40E-01        | <b>2.40E-03</b> |
| <i>FAM13A</i>  | chr4:90639515 | rs11931074 | 2777595 | chr4 | 9E+07   | 9E+07   | 2.10E-01        | 5.30E-01        | 7.70E-01 | 7.40E-01 | <b>3.60E-03</b> | 7.90E-01        | 9.60E-01 | 2.30E-01 | 9.70E-01        | 4.00E-01        | 8.00E-01        |
| <i>FAM13A</i>  | chr4:90639515 | rs11931074 | 2777593 | chr4 | 9E+07   | 9E+07   | 9.90E-01        | 8.90E-01        | 6.20E-01 | 8.90E-01 | 2.30E-01        | 6.20E-01        | 7.80E-01 | 1.30E-01 | 9.90E-01        | 2.80E-01        | <b>3.80E-03</b> |
| <i>MMRNI</i>   | chr4:90639515 | rs11931074 | 2735764 | chr4 | 9.1E+07 | 9.1E+07 | <b>3.20E-02</b> | 6.70E-02        | 5.80E-02 | 9.10E-01 | 5.70E-01        | <b>4.00E-03</b> | 6.90E-01 | 8.10E-01 | 1.60E-01        | 9.10E-02        | 3.60E-01        |
| <i>SNCA</i>    | chr4:90639515 | rs11931074 | 2777715 | chr4 | 9.1E+07 | 9.1E+07 | 8.30E-02        | 9.60E-02        | 8.90E-01 | 6.80E-01 | 4.50E-01        | 1.00E+00        | 5.20E-01 | 6.10E-01 | <b>2.30E-02</b> | 4.00E-01        | <b>5.50E-03</b> |

Abbreviations: Ave All, average across all ten regions; CRBL, cerebellum; FCTX, frontal cortex; HIPP, hippocampus; MEDU, medulla; OCTX, occipital cortex; PUTM, putamen; SNIG, substantia nigra; TCTX, temporal cortex; THAL, thalamus; WHMT, white matter. The bold text represents statistically significant results.
